# Supplementary material for: Variations in Ecuadorian Cocoa Fermentation and Drying at Two Locations: Implications for Quality and Sensory
Source: MDPI journal article supplement (doi:10.3390/foods13010137), 2023-12-30
Supplement: s1 [file s1]

## Supplementary Material

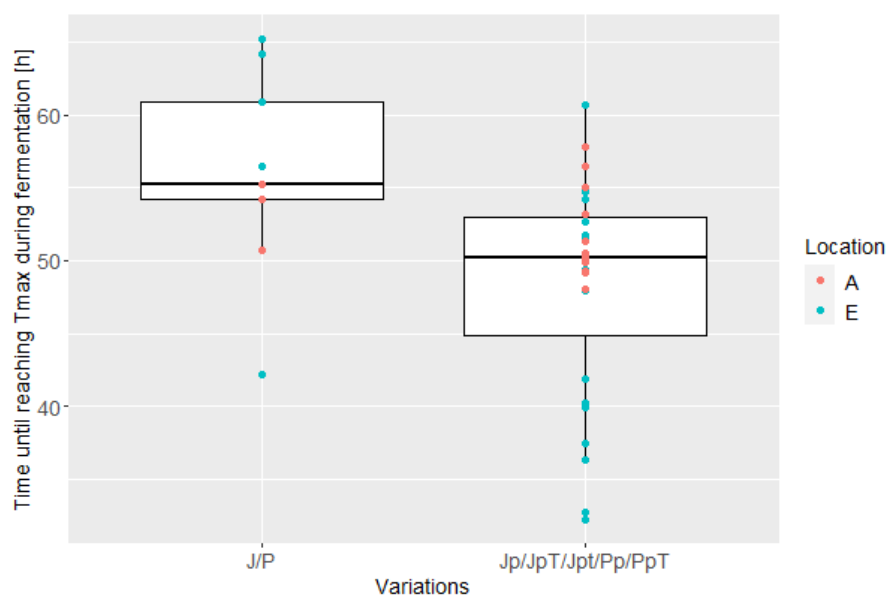

**Figure S1.** Time until reaching maximum temperature Tmax (h) during the fermentations at location A in red and at location E in blue for the following variations: J (jute bag without pre-drying, without turning; location A:  $n = 3$ , E:  $n = 4$ )/P (plastic bag without pre-drying nor turning; E:  $n = 2$ ), Jp (jute bag with pre-drying; E:  $n = 6$ )/JpT (jute bag with pre-drying and high drying temperature; A:  $n = 3$ )/Jpt (jute bag with pre-drying and turning; A:  $n = 3$ , E:  $n = 5$ )/Pp (plastic bag with pre-drying; E:  $n = 4$ )/PpT (plastic bag with pre-drying and high drying temperature; A:  $n = 3$ ).
